# Supplementary material for: 2D-black phosphorus/polyaniline hybrids for efficient supercapacitor and hydrogen evolution reaction applications
Source: Royal Society of Chemistry journal article supplement (doi:10.1039/d2se00815g), 2022-01-01
Supplement: d2se00815g1.pdf [file d2se00815g1.pdf]

## Electronic Supplementary Information

# 2D-Black Phosphorus/Polyaniline Hybrids for Efficient Supercapacitor and Hydrogen Evolution Reaction Applications

Namsheer. K <sup>a</sup>, Samadhan Kapse <sup>b</sup>, Mridula Manoj <sup>a</sup>, Ranjit Thapa <sup>b</sup>,  
Chandra Sekhar Rout <sup>a, \*</sup>

<sup>a</sup> Centre for Nano and Material Sciences, Jain University, Jain Global Campus, Jakkasandra,  
Ramanagaram, Bangalore-562112, India.

<sup>b</sup> Department of Physics, SRM University – AP, Amaravati 522502, Andhra Pradesh, India

\*Corresponding author e-mail: [r.chandrasekhar@jainuniversity.ac.in](mailto:r.chandrasekhar@jainuniversity.ac.in); [csrout@gmail.com](mailto:csrout@gmail.com)

### Calculation of areal capacitance, energy density and power density

The practical capacitance of the supercapacitors in two-electrode configuration was calculated

$$C = \frac{2I \int v dt}{A(V_i^2 - V_f^2)}$$

from the GCD curves at different current densities using  $C = \frac{2I \int v dt}{A(V_i^2 - V_f^2)}$ , where  $i$  and  $dv/dt$  are the current and the slop of discharge curve. The specific capacitance of device was calculated by  $C_X = 2C_{\text{cell}}/X$ , where  $X$  can be surface area. The areal energy density ( $E_{\text{cell}}$ ) can be calculated using  $E_{\text{cell,A}} = C_A V^2 / (8 \times 3600)$  where  $C_A$ ,  $V$  are the areal specific capacitance, and voltage window. The areal power density ( $P_{\text{cell,A}}$ ) are calculated by  $P_{\text{cell}} = E_{\text{cell}} \times 3600 / t_{\text{discharge}}$ , where  $E_{\text{cell}}$  and  $t_{\text{discharge}}$  are the entire device areal energy density and discharge time.

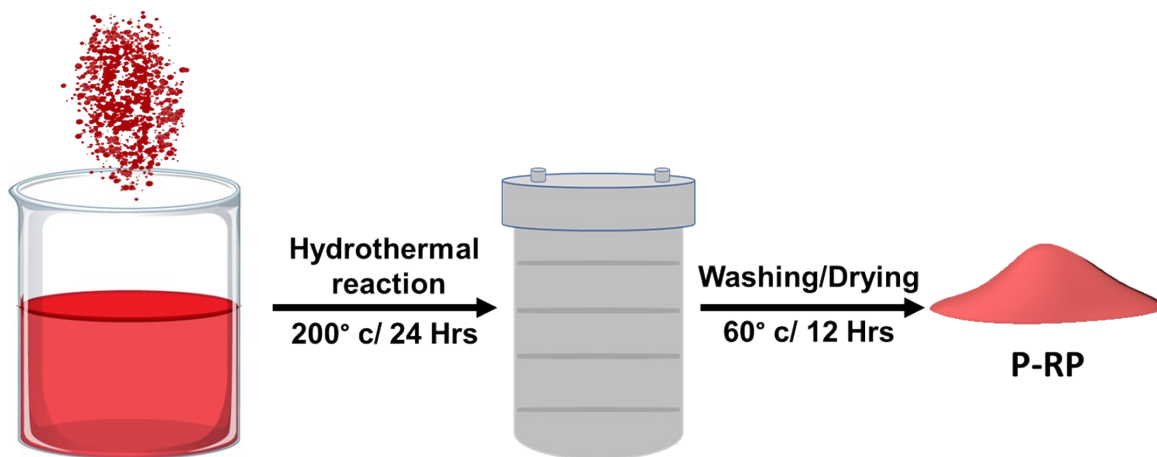

Fig.S1 Schematic illustration represents pre-treatment of red phosphorus

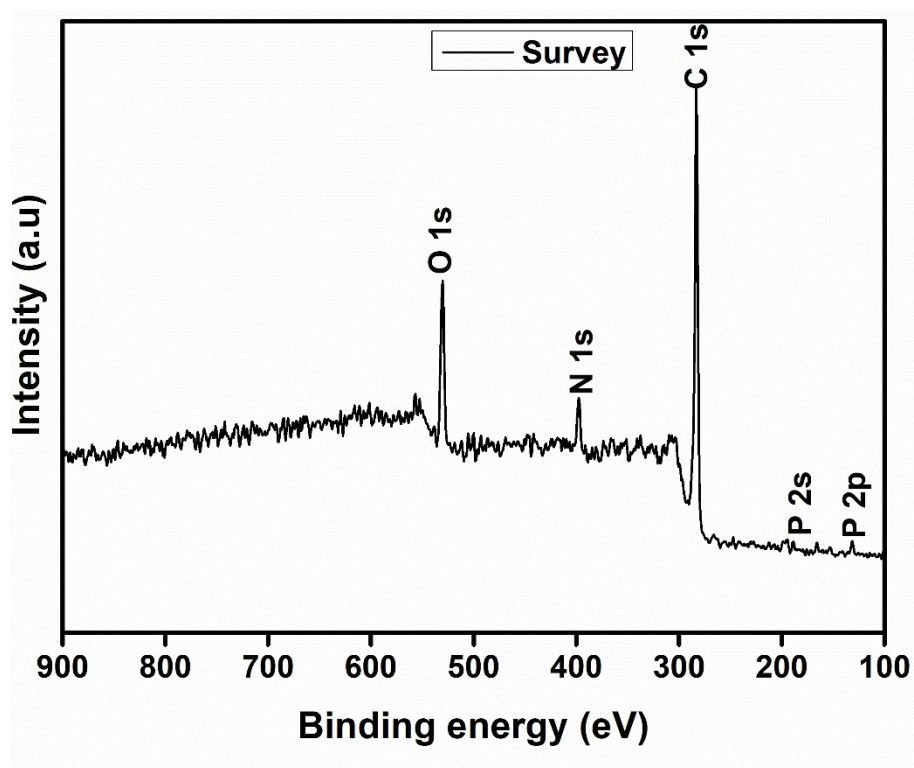

Fig.S2 XPS survey spectra of the PANI/BP.

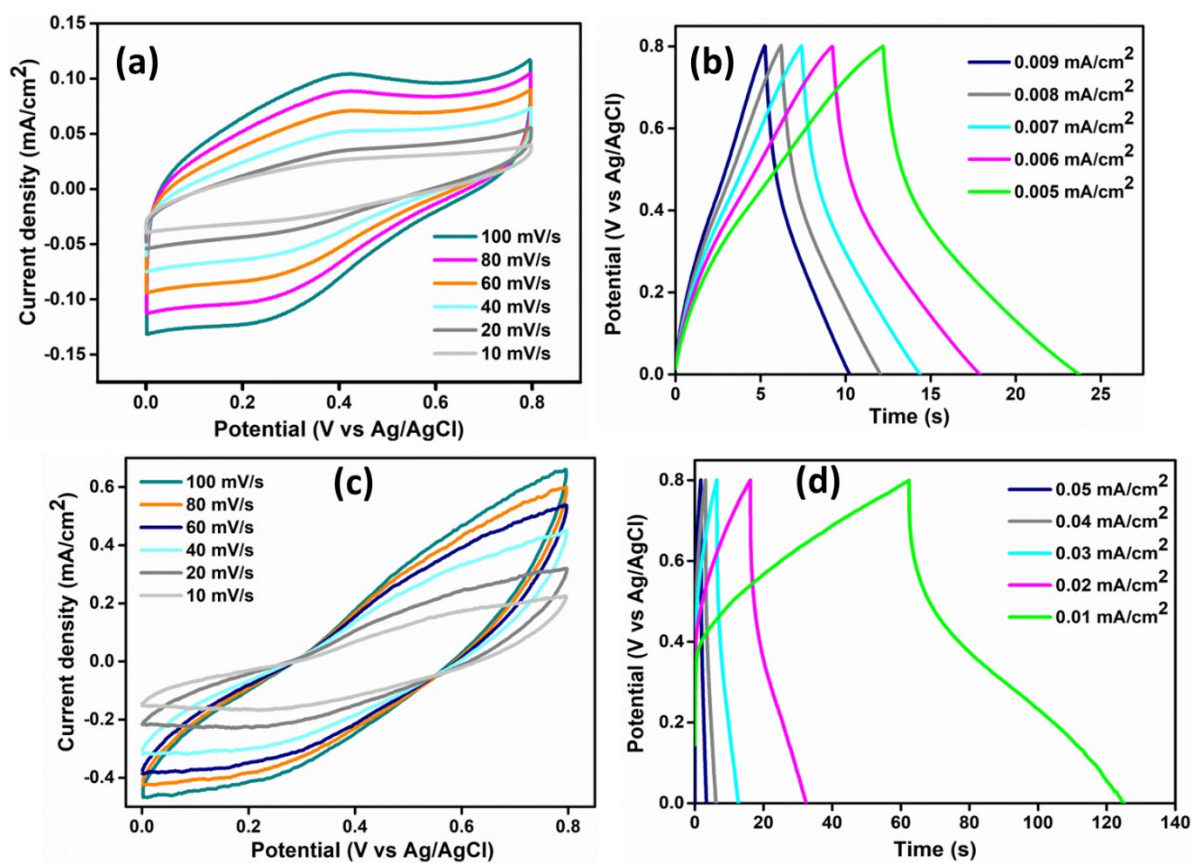

Fig.S3 CVs and GCD of prepared (a-b) BP, (c-d) PANI at different scan rate and current density.

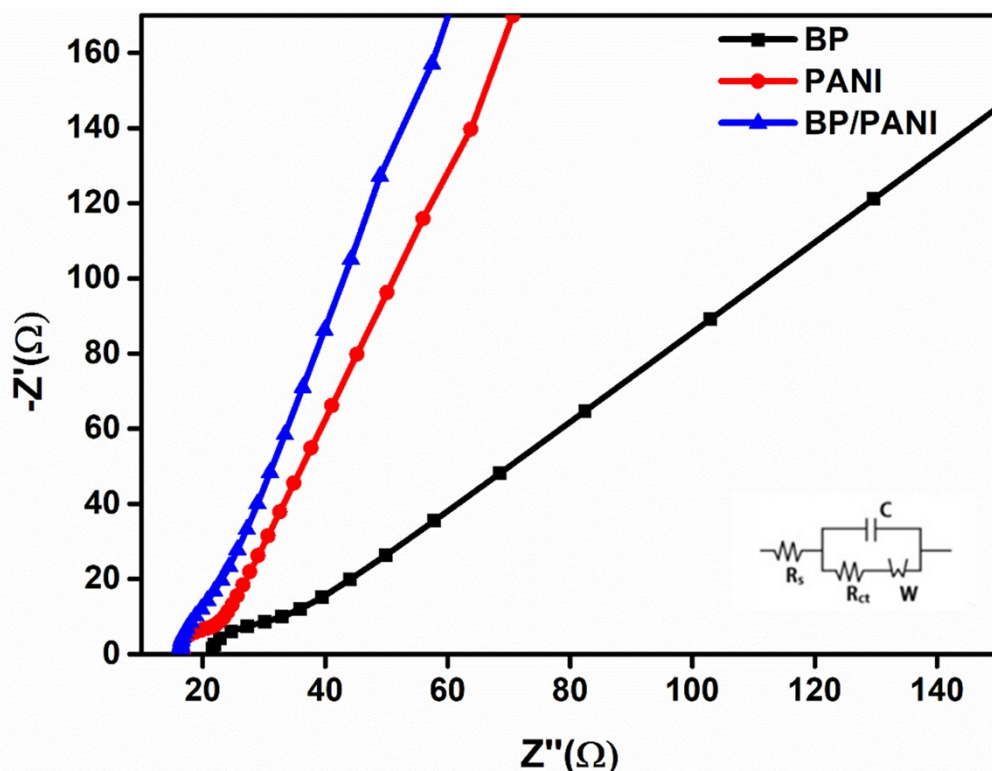

Fig.S4 Impedance spectra of prepared BP, PANI and BP/PANI

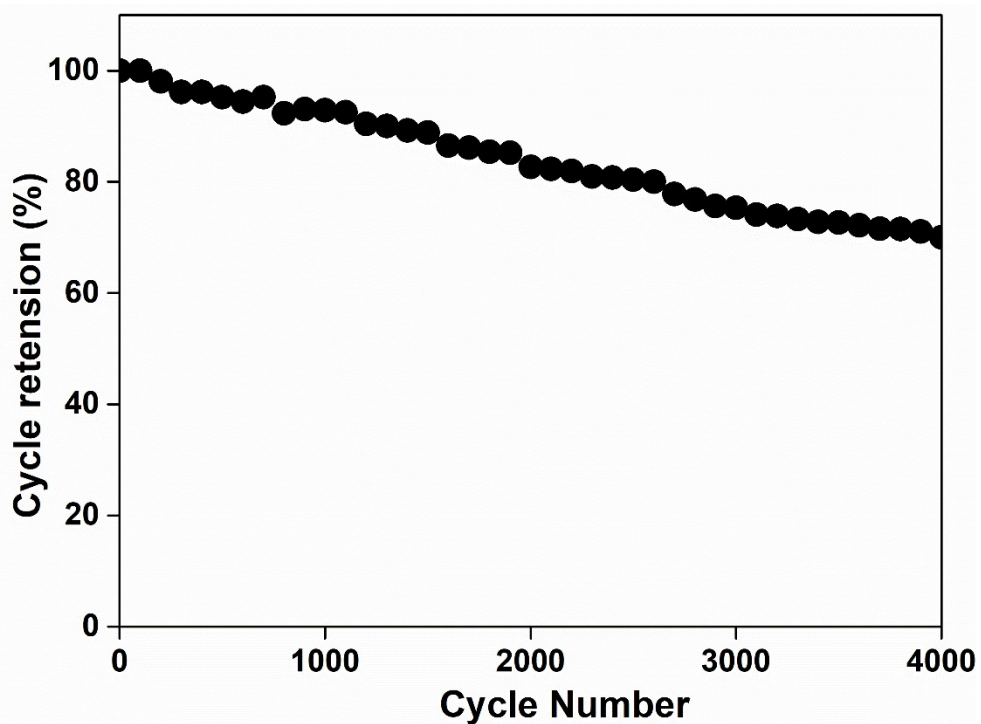

**Fig.S5** Cycling stability analysis of PANI for continues 4000 charge discharge cycle

| Material               | Capacitance<br>mF/cm <sup>2</sup> | Energy<br>density<br>μWh/cm <sup>2</sup> | Power<br>density<br>mW/cm <sup>2</sup> | Stability<br>%            | Ref |
|------------------------|-----------------------------------|------------------------------------------|----------------------------------------|---------------------------|-----|
| BP/PPy                 | -                                 | 3.3                                      | 3.2                                    | 96%                       | 1   |
| G/PANI@Cloth           | 246 m                             | 9.7                                      | 0.8                                    | 98% after<br>3800 cycles  | 2   |
| G/PANI                 | 176 mF/cm <sup>2</sup>            | 17.1                                     | 0.25                                   | 74.8 after 500<br>cycles  | 3   |
| G/PANI                 | 87.8                              | 12.2                                     | 0.226                                  | -                         | 4   |
| RGO/PPy@CNT            | 443                               | 7                                        | 8.2                                    | 94% after<br>10000 cycles | 5   |
| Carboxyl-<br>G/PPy@CNT | 196                               | 10.9                                     | 8.1                                    | 98.1% after               | 6   |

|                                   |                                          |                             |                         |                                 |              |
|-----------------------------------|------------------------------------------|-----------------------------|-------------------------|---------------------------------|--------------|
|                                   |                                          |                             |                         | 5000 cycles                     |              |
| PANI@GF                           | 357                                      | 7.9                         | 167                     | 96.4% after 5000 cycles         | 7            |
| CNT@C                             | 19.5                                     | 11.6                        | 0.52                    | -                               | 8            |
|                                   |                                          |                             |                         |                                 |              |
| rGO/C                             | 145                                      | 5.04 $\mu\text{Wh cm}^{-2}$ | 0.5 $\text{mW cm}^{-2}$ | 91% after 10000 cycles          | 9            |
| Graphene/MnO <sub>2</sub>         | 42                                       | 1.46 $\mu\text{Wh cm}^{-2}$ | 2.9 $\text{mW cm}^{-2}$ |                                 | 10           |
| Cellular Graphene                 | 2.47                                     | 0.34                        | 5.3                     | 97% after 10000 cycles          | 11           |
| Graphene/CNT                      | -                                        | 0.32                        | 23                      | -                               | 12           |
| Graphene/BP                       | 13.7                                     | 2.32                        | 0.3                     | 85%                             | 13           |
| VGN                               | 145                                      | 0.56                        | 10.5                    | 91%                             | 14           |
| MoSSe@vertically aligned graphene | 252                                      | 11.2 $\mu\text{Whcm}^{-1}$  | 130 $\text{mWcm}^{-1}$  | 80%                             | 15           |
| <b>BP/PANI<br/>Present work</b>   | <b>350 <math>\text{mFcm}^{-2}</math></b> | <b>31.2</b>                 | <b>330</b>              | <b>83.3% after 10000 cycles</b> | Present work |

**Table ST1** Comparison of the energy storage performance of BP and conducting polymer-based supercapacitors

| <b>Material</b>                     | <b>Overpotential<br/>mV</b> | <b>Tafal Slope<br/>mV/dec</b> | <b>Reference</b> |
|-------------------------------------|-----------------------------|-------------------------------|------------------|
| Vertically aligned MoS <sub>2</sub> | 300                         | 105-120                       | 16               |
| Silica polypyrrole                  | 200                         | 83                            | 17               |
| Edge BP                             | 550                         | -                             | 18               |
| BP/MoSe <sub>2</sub>                | 380                         | 97                            | 19               |
| Co <sub>3</sub> O <sub>4</sub> /PPY | 140                         | 83                            | 20               |

|                                         |            |           |                     |
|-----------------------------------------|------------|-----------|---------------------|
| Co <sub>3</sub> O <sub>4</sub> /PPY/CNT | 490        | 110       | 21                  |
| NF/PPy@SiO <sub>2</sub>                 | 192        | 77        | 22                  |
| <b>Polyaniline/BP</b>                   | <b>128</b> | <b>71</b> | <b>Present Work</b> |

**Table ST2** Comparative electrocatalytic performance of conducting polymer, BP and their composites

## Reference

- 1 S. Luo, J. Zhao, J. Zou, Z. He, C. Xu, F. Liu, Y. Huang, L. Dong, L. Wang and H. Zhang, *ACS Appl. Mater. Interfaces*, 2018, **10**, 3538–3548.
- 2 K. Li, X. Liu, S. Chen, W. Pan and J. Zhang, *Journal of Energy Chemistry*, 2019, **32**, 166–173.
- 3 X. Yang, Y. Qiu, M. Zhang, L. Zhang and H. Li, *Applied Sciences*, 2021, **11**, 8690.
- 4 H. Kwon, D. J. Han and B. Y. Lee, *RSC Adv.*, 2020, **10**, 41495–41502.
- 5 H. Zhou, L. Hou, W. Zhang and H.-J. Zhai, *Materials Chemistry and Physics*, 2020, **240**, 122259.
- 6 X. Zheng, L. Yao, Y. Qiu, S. Wang and K. Zhang, *ACS Appl. Energy Mater.*, 2019, **2**, 4335–4344.
- 7 Y. Fu, X. Cai, H. Wu, Z. Lv, S. Hou, M. Peng, X. Yu and D. Zou, *Advanced Materials*, 2012, **24**, 5713–5718.
- 8 L. Hou, R. Bao, Z. Chen, M. Rehan, L. Tong, G. Pang and C. Yuan, *Electrochimica Acta*, , DOI:10.1016/j.electacta.2016.08.038.
- 9 B. T. Ho, T. Lim, M. H. Jeong and J. W. Suk, *ACS Appl. Energy Mater.*, 2021, **4**, 8883–8890.
- 10 X. Li, T. Zhao, Q. Chen, P. Li, K. Wang, M. Zhong, J. Wei, D. Wu, B. Wei and H. Zhu, *Phys. Chem. Chem. Phys.*, 2013, **15**, 17752–17757.
- 11 Y. Shao, J. Li, Y. Li, H. Wang, Q. Zhang and R. B. Kaner, *Mater. Horiz.*, 2017, **4**, 1145–1150.
- 12 K. Liu, Y. Yao, T. Lv, H. Li, N. Li, Z. Chen, G. Qian and T. Chen, *Journal of Power Sources*, 2020, **446**, 227355.

- 13 H. Xiao, Z.-S. Wu, L. Chen, F. Zhou, S. Zheng, W. Ren, H.-M. Cheng and X. Bao, *ACS Nano*, 2017, **11**, 7284–7292.
- 14 S. Zheng, Z. Li, Z.-S. Wu, Y. Dong, F. Zhou, S. Wang, Q. Fu, C. Sun, L. Guo and X. Bao, *ACS Nano*, 2017, **11**, 4009–4016.
- 15 N. K., S. R. Polaki and C. S. Rout, *Journal of Energy Storage*, 2022, **52**, 1050
- 16 Kong D, Wang H, Cha JJ, Pasta M, Koski KJ, Yao J, et al. Synthesis of MoS<sub>2</sub> and MoSe<sub>2</sub> Films with Vertically Aligned Layers. *Nano Lett* 2013;13:1341–7. <https://doi.org/10.1021/nl400258t>.
- 17 Feng J-X, Xu H, Ye S-H, Ouyang G, Tong Y-X, Li G-R. Silica–Polypyrrole Hybrids as High-Performance Metal-Free Electrocatalysts for the Hydrogen Evolution Reaction in Neutral Media. *Angewandte Chemie International Edition* 2017;56:8120–4. <https://doi.org/10.1002/anie.201702934>.
- 18 Sofer Z, Sedmidubský D, Huber Š, Luxa J, Bouša D, Boothroyd C, et al. Layered Black Phosphorus: Strongly Anisotropic Magnetic, Electronic, and Electron-Transfer Properties. *Angewandte Chemie International Edition* 2016;55:3382–6. <https://doi.org/10.1002/anie.201511309>.
- 19 Li W, Liu D, Yang N, Wang J, Huang M, Liu L, et al. Molybdenum diselenide – black phosphorus heterostructures for electrocatalytic hydrogen evolution. *Applied Surface Science* 2019;467–468:328–34. <https://doi.org/10.1016/j.apsusc.2018.10.127>.
- 20 Wang D-G, Liang Z, Gao S, Qu C, Zou R. Metal-organic framework-based materials for hybrid supercapacitor application. *Coordination Chemistry Reviews* 2020;404:213093. <https://doi.org/10.1016/j.ccr.2019.213093>.
- 21 Jayaseelan SS, Bhuvanendran N, Xu Q, Su H. Co<sub>3</sub>O<sub>4</sub> nanoparticles decorated Polypyrrole/carbon nanocomposite as efficient bi-functional electrocatalyst for electrochemical water splitting 2020. <https://doi.org/10.1016/j.ijhydene.2019.12.085>.
- 22 Zheng H, Yang F, Xiong T, Adekoya D, Huang Y, Balogun M-SJT. Polypyrrole Hollow Microspheres with Boosted Hydrophilic Properties for Enhanced Hydrogen Evolution Water Dissociation Kinetics. *ACS Appl Mater Interfaces* 2020;12:57093–101. <https://doi.org/10.1021/acsami.0c16938>.
